# Supplementary material
Source: PubMed Central journal article supplement (PMC5724266)
Supplement: pnas.201710877SI.pdf [file pnas.201710877SI.pdf]

# Supporting Information

Ring et al. 10.1073/pnas.1710877114

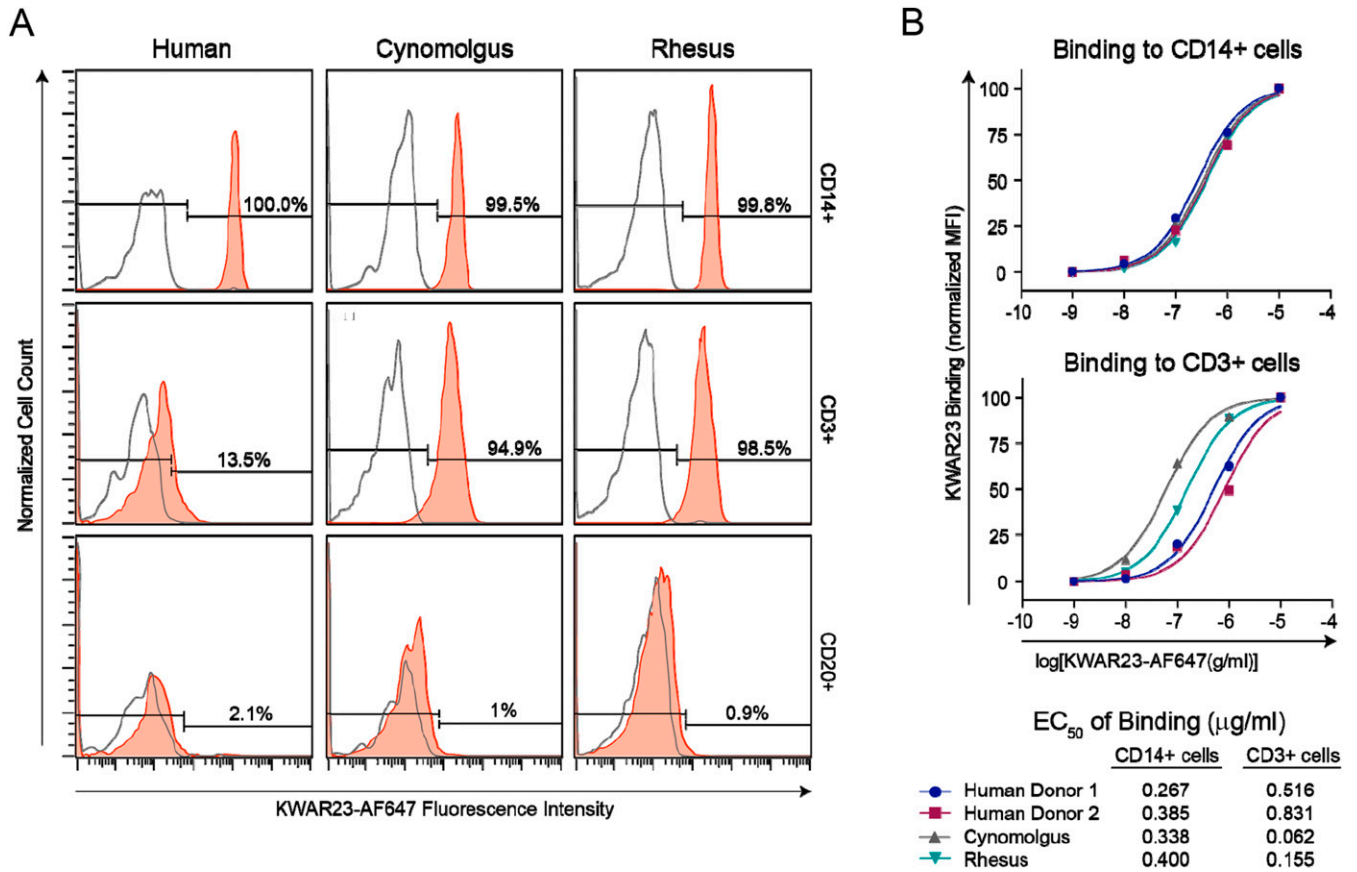

**Fig. S1.** Antihuman SIRP $\alpha$  antibody KWAR23 also binds to nonhuman primate SIRP $\alpha$ . (A and B) KWAR23 binds cynomolgus and rhesus SIRP $\alpha$  expressed on CD14<sup>+</sup> monocytes and CD3<sup>+</sup> T cells, but not CD20<sup>+</sup> B cells.

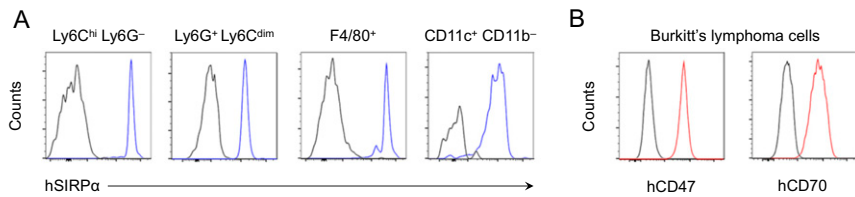

**Fig. S2.** Expression of human SIRP $\alpha$  (hSIRP $\alpha$ ) in human *SIRPA* knockin *Rag2*<sup>-/-</sup> *Il2rg*<sup>-/-</sup> (SRG) mice, and expression of hCD47 and hCD70 on Burkitt's lymphoma cells. (A) Exons 2–4 of the mouse *Sirpa* (extracellular domain) were replaced by the human *SIRPA* sequence using VelociGene Technology (Regeneron Pharmaceuticals) (18). Expression of hSIRP $\alpha$  in circulating Ly6C<sup>hi</sup> monocytes, neutrophils (Ly6G<sup>+</sup> Ly6C<sup>dim</sup>), macrophages (F4/80<sup>+</sup>), and dendritic cells (CD11c<sup>+</sup>CD11b<sup>-</sup>) in RG (black) and SRG mice (blue) analyzed by flow cytometry. Histograms are representative of two RG and six SRG mice. (B) Histograms showing expression of hCD47 and hCD70 in stained (red) and unstained (black) Burkitt's lymphoma cells. One representative experiment is shown.

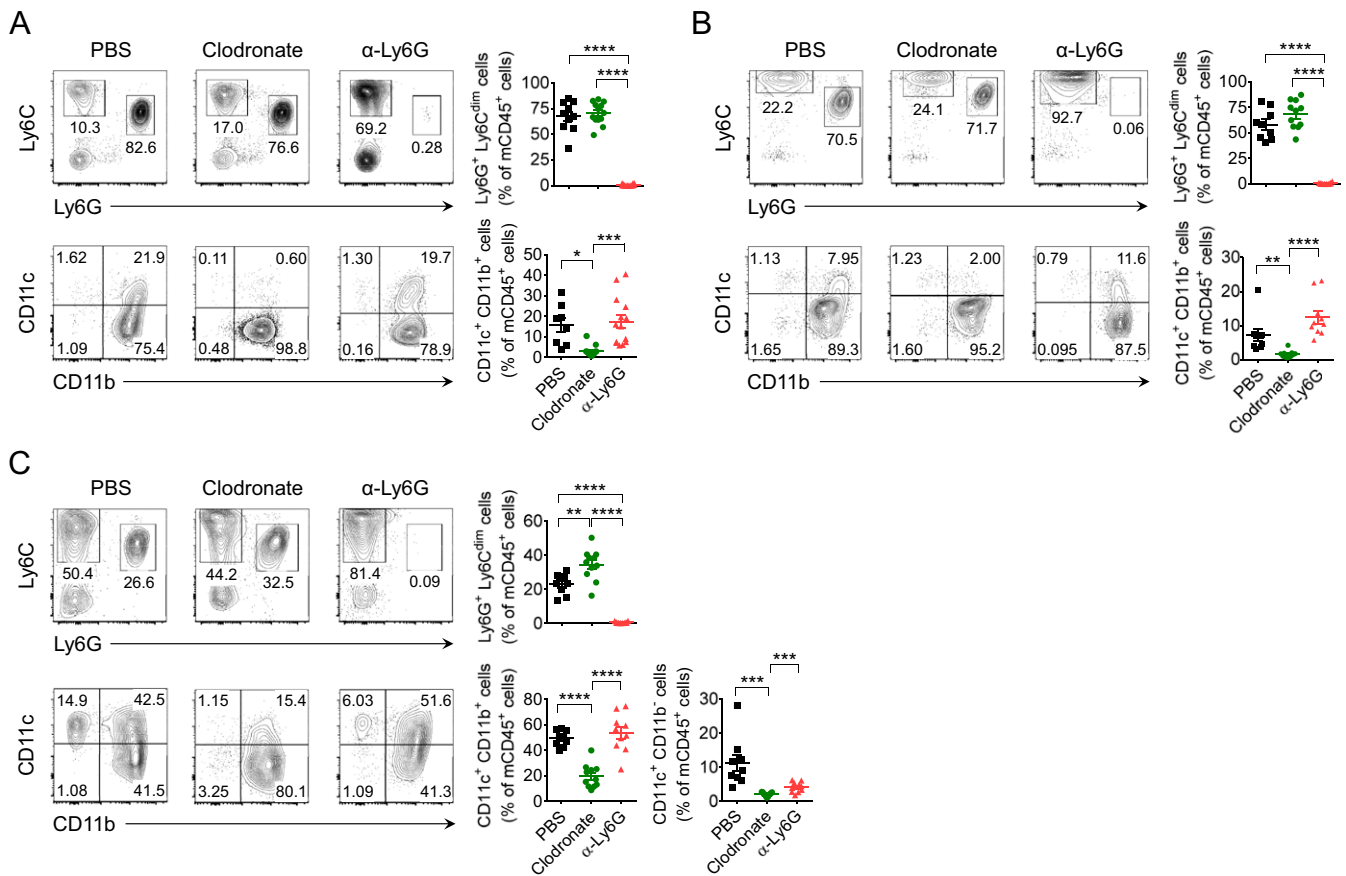

**Fig. S3.** In vivo depletion of myeloid cell lineages in SRG mice. Efficacy of the depletion of myeloid cell lineages in the peripheral blood (A and B) and tumor (C) of SRG mice treated with PBS, clodronate, or  $\alpha$ -Ly6G before initiation of therapeutic antibody treatment (A) or at the end of the experiment (B and C) is shown. Mean  $\pm$  SEM is shown. \* $P$  < 0.05; \*\* $P$  < 0.01; \*\*\* $P$  < 0.001; \*\*\*\* $P$  < 0.0001 (unpaired two-tailed Student's  $t$  test).

**Table S1. Data collection and refinement statistics**

| Data collection and refinement parameters            | KWAR23 Fab/SIRP $\alpha$ IgV complex |
|------------------------------------------------------|--------------------------------------|
| <b>Data collection</b>                               |                                      |
| Wavelength                                           | 0.9795                               |
| Space group                                          | P 3 <sub>2</sub> 2 1                 |
| Cell dimensions                                      |                                      |
| <i>a</i> , <i>b</i> , <i>c</i> , Å                   | 164.97, 164.97, 96.72                |
| $\alpha$ , $\beta$ , $\gamma$ , °                    | 90, 90, 120                          |
| Resolution, Å                                        | 47.52–2.19 (2.27–2.19)*              |
| <i>R</i> <sub>sym</sub> or <i>R</i> <sub>merge</sub> | 0.086 (0.853)                        |
| <i>I</i> / $\sigma$ <i>I</i>                         | 21.5 (1.6)                           |
| Completeness, %                                      | 99.2 (87.9)                          |
| Redundancy                                           | 6.0 (4.3)                            |
| <b>Refinement</b>                                    |                                      |
| Resolution, Å                                        | 2.20                                 |
| No. of reflections                                   | 76,965 (6,916)                       |
| <i>R</i> <sub>work</sub> / <i>R</i> <sub>free</sub>  | 0.18/0.22                            |
| No. of atoms                                         | 8,806                                |
| Macromolecules                                       | 8,166                                |
| Solvent                                              | 640                                  |
| <i>B</i> -factors, Å <sup>2</sup>                    |                                      |
| Macromolecules                                       | 50.90                                |
| Solvent                                              | 47.04                                |
| rmsd                                                 |                                      |
| Bond lengths, Å                                      | 0.003                                |
| Bond angles, °                                       | 0.87                                 |
| Ramachandran plot                                    |                                      |
| Residues in most favored regions, %                  | 97.1                                 |
| Residues in allowed regions, %                       | 2.9                                  |
| Residues in disallowed regions, %                    | 0.0                                  |

\*Values in parentheses are for highest resolution shell.

**Table S2. Amino acid sequences of antibody V-regions**

| Antibody name                      | V-region sequence                                                                                                                                                                                                                                              |
|------------------------------------|----------------------------------------------------------------------------------------------------------------------------------------------------------------------------------------------------------------------------------------------------------------|
| KWAR23 heavy chain                 | EVQLQQSGAELVKPGASVKLSCTASGFNIKDYIHWVQQRTEQ<br>GLEWIGRIDPEDGETKYAPKFQDKATITADTSSNTAYLHLSLST<br>SEDTAVYYCARWGAYWGQGLTVTVA                                                                                                                                        |
| KWAR23 light chain                 | QIVLTQSPAIMASPGKEKVTLTCSASSVSSSYLYWYQQKPGSSP<br>KLWIYSTSNLASGVPARFSGSGSSTSYSLTISSMEAEADAASYFCH<br>QWSSYPRTFGAGTKLELK                                                                                                                                           |
| Vorsetuzumab heavy chain           | QVQLVQSGAEVKKPGASVKVSKASGYFTFTNYGMNWRQAP<br>GQGLKWMGWINTYTGPEPTADAFKGRVTMTRDTSISTAYMEL<br>SRLRSDDTAVYYCARDYGDYGMGYWGQGTITVTVSS                                                                                                                                 |
| Vorsetuzumab light chain           | DIVMTQSPDSLAVSLGERATINCRASKSVSTSGYSFMHWYQQK<br>PGQPPKLLIYLASNLESGVPDRFSGSGSGTDFTLTISSLQAEDVA<br>VYYCQHSREVPWTFGQGTKEIK                                                                                                                                         |
| CD70/KWAR23 bispecific heavy chain | QVQLVQSGAEVKKPGASVKVSKASGYFTFTNYGMNWRQAP<br>GQGLKWMGWINTYTGPEPTADAFKGRVTMTRDTSISTAYMEL<br>SRLRSDDTAVYYCARDYGDYGMGYWGQGTITVTVSSASTKGP<br>VQLQQSGAELVKPGASVKLSCTASGFNIKDYIHWVQQRTEQ<br>GLEWIGRIDPEDGETKYAPKFQDKATITADTSSNTAYLHLSLSTSE<br>DTAVYYCARWGAYWGQGLTVTVA |
| CD70/KWAR23 bispecific light chain | DIVMTQSPDSLAVSLGERATINCRASKSVSTSGYSFMHWYQQK<br>PGQPPKLLIYLASNLESGVPDRFSGSGSGTDFTLTISSLQAEDVA<br>VYYCQHSREVPWTFGQGTKEIKRTVAAPQIVLTQSPAIMASPG<br>KEKVTLTCSASSVSSSYLYWYQQKPGSSPKLWIYSTSNLASG<br>VPARFSGSGSSTSYSLTISSMEAEADAASYFCHQWSSYPRTFGAGT<br>KLELK           |
